# Supplementary material for: Evaluation and Mitigation of Racial Bias in Clinical Machine Learning Models: Scoping Review
Source: PubMed Central journal article supplement (PMC9198828; doi:10.2196/36388), 2022-05-31
Supplement: medinform_v10i5e36388_app1.pdf [file medinform_v10i5e36388_app1.pdf]

# Multimedia Appendix 1.

## Bias Definitions

| Term                | Definition                                                                                                                                     |
|---------------------|------------------------------------------------------------------------------------------------------------------------------------------------|
| Historical bias     | Bias resulting from the propagation of existing real-world inequities into datasets.                                                           |
| Measurement bias    | Also known as reporting bias; results from the selection, measurement, and utilization of particular features.                                 |
| Representation bias | Bias resulting from the sampling method used to collect data on populations, leading to non-representative samples.                            |
| Temporal bias       | Bias arising from changing behaviors and population characteristics over time.                                                                 |
| Algorithmic bias    | Bias added solely by an algorithm, independent of the data.                                                                                    |
| Population bias     | Bias resulting from application of a model in a population that differs in characteristics from the original target or development population. |
| Aggregation bias    | Bias occurring when conclusions drawn from a population are erroneously applied to individuals.                                                |

*Definitions of common forms of bias relevant to clinical machine learning. For a more comprehensive overview, we recommend the following resource:*

*Mehrabi N, Morstatter F, Saxena N, Lerman K, Galstyan A. A survey on bias and fairness in machine learning. ACM Comput Surv 2021 Jul;54(6):1-35. [doi: 10.1145/3457607]*

## Database Search Queries

PubMed query

```
("artificial intelligence"[MeSH] OR "artificial intelligence*"[tiab] OR "machine learning*"[tiab] OR "deep learning*"[tiab] OR "supervised learning"[tiab] OR "unsupervised learning"[tiab] OR "neural network*"[tiab] OR "support vector machine*"[tiab] OR "markov decision process*"[tiab] OR "markov model*"[tiab] OR "natural language"[tiab] OR "decision tree*"[tiab] OR "k-nearest neighbor*"[tiab] OR "k nearest neighbor*"[tiab] OR "fuzzy c-mean*"[tiab] OR "fuzzy c mean*"[tiab] OR "deep-learning"[tiab] OR "deep feature"[tiab] OR "deep neural network*"[tiab] OR "deep belief network*"[tiab] OR "artificial neural network"[tiab] OR "convolutional neural network*"[tiab] OR "recurrent neural network*"[tiab] OR "feedforward neural network*"[tiab] OR "Boltzmann machine*"[tiab] OR "long short-term memory"[tiab] OR "long short term memory"[tiab] OR "gated recurrent unit"[tiab] OR "autoencoder"[tiab] OR "multilayer perceptron"[tiab] OR "convnet"[tiab] OR "convolutional learning"[tiab] OR "generative model"[tiab] OR "generative adversarial network"[tiab])  
AND  
("bias*"[tiab] OR "racis*"[tiab] OR "prejud*"[tiab] OR "fair*"[tiab] OR "equity"[tiab] OR "equitab*"[tiab] OR "unfair*"[tiab] OR "inequity"[tiab] OR "inequitab*"[tiab])  
AND  
("race"[tiab] OR "racial*"[tiab] OR "ethnic*"[tiab])
```

Embase query

```
('machine learning'/exp OR 'artificial intelligence*':ti,ab OR 'machine learning*':ti,ab OR 'deep learning*':ti,ab OR 'supervised learning':ti,ab OR 'unsupervised learning':ti,ab OR 'neural network*':ti,ab OR 'support vector machine*':ti,ab OR 'markov decision process*':ti,ab OR 'markov model*':ti,ab OR 'natural language':ti,ab OR 'decision tree*':ti,ab OR 'k-nearest neighbor*':ti,ab OR 'k nearest neighbor*':ti,ab OR 'fuzzy c-mean*':ti,ab OR 'fuzzy c mean*':ti,ab OR 'deep-learning':ti,ab OR 'deep feature':ti,ab OR 'deep neural network*':ti,ab OR 'deep belief network*':ti,ab OR 'artificial neural network':ti,ab OR 'convolutional neural network*':ti,ab OR 'recurrent
```

neural network\*:ti,ab OR 'feedforward neural network\*:ti,ab OR 'boltzmann machine\*:ti,ab OR 'long short-term memory':ti,ab OR 'long short term memory':ti,ab OR 'gated recurrent unit':ti,ab OR 'autoencoder':ti,ab OR 'multilayer perceptron':ti,ab OR 'convnet':ti,ab OR 'convolutional learning':ti,ab OR 'generative model':ti,ab OR 'generative adversarial network':ti,ab)  
 AND  
 ('bias\*':ti,ab OR 'racis\*':ti,ab OR 'prejud\*':ti,ab OR 'fair\*':ti,ab OR 'equity':ti,ab OR 'equitab\*':ti,ab OR 'unfair\*':ti,ab OR 'inequity':ti,ab OR 'inequitab\*':ti,ab)  
 AND  
 ('race':ti,ab OR 'racial\*':ti,ab OR 'ethnic\*':ti,ab)

#### Scopus query

(TITLE-ABS ("artificial intelligence\*" OR "machine learning\*" OR "deep learning\*" OR "supervised learning" OR "unsupervised learning" OR "neural network\*" OR "support vector machine\*" OR "markov decision process\*" OR "markov model\*" OR "natural language" OR "decision tree\*" OR "k-nearest neighbor\*" OR "k nearest neighbor\*" OR "fuzzy c-mean\*" OR "fuzzy c mean\*" OR "deep-learning" OR "deep feature" OR "deep neural network\*" OR "deep belief network\*" OR "artificial neural network" OR "convolutional neural network\*" OR "recurrent neural network\*" OR "feedforward neural network\*" OR "Boltzmann machine\*" OR "long short-term memory" OR "long short term memory" OR "gated recurrent unit" OR "autoencoder" OR "multilayer perceptron" OR "convnet" OR "convolutional learning" OR "generative model" OR "generative adversarial network"))  
 AND  
 (TITLE-ABS ("bias\*" OR "racis\*" OR "prejud\*" OR "fair\*" OR "equity" OR "equitab\*" OR "unfair\*" OR "inequity" OR "inequitab\*"))  
 AND  
 (TITLE-ABS ("race" OR "racial\*" OR "ethnic\*"))

#### Google Scholar query

"racial bias artificial intelligence health"

### Study Dataset Characteristics and Code Availability

| Author             | Year | Country                 | Dataset size                                  | Data source                           | Model type                                                                        | Code availability                   |
|--------------------|------|-------------------------|-----------------------------------------------|---------------------------------------|-----------------------------------------------------------------------------------|-------------------------------------|
| Abubakar et al.    | 2020 | United Kingdom, Nigeria | 1360 (Caucasian), 540 (African)               | Institutional data from two hospitals | ResNet50 (CNN)                                                                    | No                                  |
| Allen et al.       | 2020 | United States           | 28,460                                        | MIMIC-III                             | XGBoost                                                                           | Yes (data reweighting)              |
| Briggs & Hollmén   | 2020 | Sweden                  | 48,784                                        | Dissecting Bias                       | Unspecified; classification algorithms were selected per AI Fairness 360 examples | Yes                                 |
| Burlina et al.     | 2021 | United States           | 21,720                                        | Kaggle EyePACS                        | ResNet50 (CNN)                                                                    | No                                  |
| Chen et al.        | 2019 | United States           | 25,879 (ICU notes); 4,214 (psychiatric notes) | MIMIC-III; single-institutional data  | Logistic regression                                                               | Yes (data selection, bias analysis) |
| Gianattasio et al. | 2020 | United States           | 835                                           | Aging Demographics and Memory Study   | Logistic regression, LASSO                                                        | Yes (development)                   |
| Noseworthy et al.  | 2020 | United States           | 97,829                                        | Single-institutional data             | CNN                                                                               | Request                             |

|                         |      |               |         |                                       |                                             |                                  |
|-------------------------|------|---------------|---------|---------------------------------------|---------------------------------------------|----------------------------------|
| Obermeyer et al.        | 2019 | United States | 49,618  | Single-institutional data             | LASSO                                       | Yes (development, bias analysis) |
| Park et al.             | 2021 | United States | 573,634 | IBM MarketScan Medicaid Database      | Logistic regression, random forest, XGBoost | No                               |
| Seyyed-Kalantari et al. | 2021 | Canada        | 129,819 | MIMIC-CXR                             | DenseNet (CNN)                              | No                               |
| Thompson et al.         | 2021 | United States | 53,974  | Institutional data from two hospitals | CNN                                         | Yes (development)                |
| Wissel et al.           | 2019 | United States | 3,776   | Single-institutional data             | SVM                                         | No                               |

*Supplementary Table 1: Study dataset characteristics and code availability. CNN: convolutional neural network; XGBoost: extreme gradient boosting; AI: artificial intelligence; ICU: intensive care unit; LASSO: least absolute shrinkage and selection operator; AUC: area under the receiver operating characteristic curve; SVM: support vector machine*
